# Supplementary material for: Circadian Gene Clock Regulates Psoriasis-Like Skin Inflammation in Mice
Source: PubMed Central journal article supplement — J Invest Dermatol. 2015 Sep 10;135(12):3001–8. doi: 10.1038/jid.2015.316 (PMC4653315; doi:10.1038/jid.2015.316), 2015-09-10
Supplement: jid2015316x1.pdf [file jid2015316x1.pdf]

## 1 **Supplementary Materials and Methods**

### 2 **Mice**

3 Female 9-11 week-old mice were used for this study. *Clock* <sup>$\Delta 19/\Delta 19$</sup>  mice have an A to T  
4 point mutation in the 5' splice site of intron 19 and, as a consequence, an in-frame  
5 deletion of the entire exon 19 (*Clock* <sup>$\Delta 19/\Delta 19$</sup> ), which results in the loss of normal  
6 transcriptional activity (Vitaterna et al. 1994). *mPer2* <sup>$m/m$</sup>  mice have an in-frame deletion  
7 mutation in the PAS domain (a dimerization domain found in Per, Arnt and Sim) of  
8 *mPer2*, which results in the loss of normal transcriptional activity (Zheng et al. 1999).  
9 Mast cell-deficient WBB6F1-W/W<sup>v</sup> mice and control wild-type WBB6F1-<sup>+/+</sup> mice  
10 were purchased from Japan SLC. All animal experiments were approved by the  
11 Institutional Review Board of the University of Yamanashi and performed under the  
12 Declaration of Helsinki protocols.

### 13 **IMQ-induced psoriasis-like skin inflammation**

14 Mice were treated daily for 5 consecutive days on both ears and shaved dorsal skin with  
15 31.2 mg of commercially available imiquimod (IMQ) cream (5% Beselna cream,  
16 Mochida Pharmaceutical, Tokyo, Japan) or Vaseline at ZT2. Imiquimod cream mixed

17 Vaseline in one to one and used. All animal experiments were approved by the

18 Institutional Review Board of the University of Yamanashi.

### 19 **Intradermal IL-23 Injection**

20 To induce IL-23-mediated psoriasis-like skin inflammation, 20  $\mu$ l PBS, either alone or

21 containing 500 ng recombinant mouse IL-23 (Biolegend, San Diego, CA) was

22 intradermally injected into the ears of anesthetized mice using a 30-gauge needle under

23 the microscope (Wraymer Inc., Ohsaka, Japan) at ZT2. *Clock* <sup>$\Delta$ 19/ $\Delta$ 19</sup> mice (C57BL/6

24 genetic background) and their control mice were injected every other day for 5 days.

25 *mPer2* <sup>$m/m$</sup>  mice (ICR genetic background) and their control mice were injected every

26 other day for 10 days. Ear thickness was measured every day. On the injected days, ear

27 thickness was measured immediately before injections.

### 28 **Scoring severity of skin inflammation**

29 Ear thickness was measured using an engineer's micrometer at indicated time points.

30 The  $\Delta$  ear thickness is calculated as the changes in ear thickness ([ear thickness at the

31 indicated time points] - [ear thickness before treatment on day 0]). A scoring system

32 based on the clinical Psoriasis Area and Severity Index, except for the affected skin area,

33 was used (van der Fits et al, 2009). Erythema, scaling, and thickening of ears were  
34 scored at ZT2 independently from 0 to 4: 0, none; 1, slight; 2, moderate; 3, marked; and  
35 4, very marked. The scoring was performed in a blinded fashion: investigators were not  
36 informed which mice were treated or untreated with IMQ or IL-23. The cumulative  
37 score served as a measure of the severity of inflammation (scale 0-12).

### 38 **Isolation of leukocytes from the ear**

39 The ear was cut into small pieces and incubated in RPMI 1640 medium containing  
40 Liberase TL (0.5 mg/ml, Roche, Basel, Switzerland) for 1 hour at 37°C. A suspension of  
41 single cells was separated from undigested tissue by passing through a 40- $\mu$ m nylon cell  
42 strainer.

### 43 **FACS staining**

44 Monoclonal fluorescent antibodies against mouse CD3 $\epsilon$ ,  $\gamma\delta^+$  TCR, B220, IL-22,  
45 IL-23p40 were purchased from eBioscience (San Diego, CA). Monoclonal fluorescent  
46 antibodies against mouse CD4 and IL-23R were purchased from Beckman Coulters  
47 (Brea, CA) and R&D (Minneapolis, MN). CD8a, I-A/I-E, IL-17A were purchased from  
48 BD Pharmingen (San Diego, CA), respectively. The spleen, lymph nodes or thymus

49 from mice were incubated for 15 minutes with Fc receptor blocking mAb (BD  
50 Biosciences, San Diego, CA) to block nonspecific bindings, and then were stained with  
51 FITC-conjugated anti-mouse CD4 Ab or B220 Ab, PE-conjugated anti-mouse  $\gamma\delta$ TCR  
52 Ab or I-A/I-E Ab, PerCP-conjugated anti-mouse IL-23R Ab and APC-conjugated  
53 anti-mouse CD3 $\epsilon$ Ab or CD8a Ab in PBS for 30 minutes on ice. The stained cells  
54 (live-gated on the basis of forward and side scatter profiles) were analyzed. Isolated  
55 cells from ear were incubated for 15 minutes with Fc receptor blocking mAb (BD  
56 Bioscience), and then were stained with FITC-conjugated Annexin V (BD Pharmingen),  
57 PE-conjugated anti-mouse  $\gamma\delta^+$ TCR Ab and APC-conjugated anti-mouse CD3 $\epsilon$  in PBS  
58 for 30 minutes on ice. Viable cells were identified by Annexin V uptake. For  
59 intracellular cytokine staining, cells were incubated in the presence of 2  $\mu$ g/ml  
60 brefedrinA for 4 hours. Viable cells were identified by APC-conjugated Fixable viability  
61 Dye cell staining (eBioscience). Successively, cells were incubated with Fc receptor  
62 blocking mAb (BD Bioscience), and stained surface antigens. Cells were then fixed and  
63 permeabilized using eBioscience IC Fixation and Permeabilization Kit. And then were  
64 stained with FITC-conjugated anti-mouse IL-23p40 Ab, Alexa Fluor488-conjugated

65 anti-mouse IL-17A or PerCP-conjugated anti-mouse IL-22 Ab for 30 minutes. All  
66 samples were analyzed with BD Accuri™C6 flow cytometry (Becton Dickinson,  
67 Franklin Lakes, NJ).

#### 68 **Splenic $\gamma/\delta^+$ T cell preparation and culture**

69  $\gamma/\delta^+$  T cells were purified from spleens by mouse  $\gamma/\delta^+$  TCR<sup>+</sup> T cell Isolation Kit  
70 (Milteny Biotec, Bergisch Gladbach, Germany) at ZT2. Cells were stimulated for 72  
71 hours with IL-23 (10 ng/ml, R&D) or medium alone in the presence of anti-CD3 (2  
72  $\mu$ g/ml, eBioscience). After 72 hours, IL-17A or IL-22 concentrations in the supernatants  
73 were determined by ELISA (eBioscience).

#### 74 **ELISA**

75 A Ready-Set-Go kit was used according to the manufacturer's protocol (eBioscience)  
76 for ELISA of IL-17A and IL-22. Mouse IgG ELISA Quantitation set (Bethyl  
77 Laboratories Inc, TX), Mouse IgA ELISA kit (Immunology consultants Laboratories Inc,  
78 Portland) and Mouse IgE ELISA kit (Morinaga, Yokohama, Japan) was used according  
79 to the manufacturer's protocol for ELISA of serum and fecal immunoglobulins.

#### 80 **Quantitative real-time PCR (qPCR)**

81 RNA was harvested from splenic  $\gamma/\delta^+$  T cells or skin with RNeasy<sup>®</sup> Plus Micro Kit or  
82 RNeasy<sup>®</sup> Protect Mini Kit (QIAGEN, Venlo, Netherland) according to the  
83 manufacture's protocol. RT was performed using ReverTra Ace<sup>®</sup> qPCR RT Kit  
84 (TOYOBO, Ohsaka, Japan). Analysis of *IL-17A*, *IL-22*, *IL-23R*, *IL-23p19*, *S100A8*,  
85 *Keratin16*, *Reg3g*, *Period2 (Per2)*, *Bmal1 (Arntl)*, and *Clock* mRNA levels was  
86 performed using commercially available primer/probe sets (TaqMan<sup>®</sup> Gene Expression  
87 Assay, Applied Biosystems, Foster City, CA). The accession numbers of the  
88 primer/probe sets are as follows; *Bmal1 (Arntl)*: Mm00500226-m1, *Clock*:  
89 Mm00455950-m1, *Gapdh*: Mm99999915-g1, *IL-17A*: Mm00439618-m1, *IL-22*:  
90 Mm01226722-g1, *IL-23p19*: Mm01160011-g1, *IL-23R*: Mm00519943-m1, *Keratin16*:  
91 Mm01306670-g1, *Per2*: Mm00478113-m1, *Reg3g*: Mm00441127-m1, *S100A8*:  
92 Mm00496696-g1. The *Clock* primers/probe (Mm00455950-m1) are designed to amplify  
93 the specific sequences in the exon 15-16 of the gene and the deletion of the exon 19  
94 (*Clock*<sup>*Δ19/Δ19*</sup>) does not affect the mRNA stability of mutated *Clock* (Vitaterna et al.  
95 1994). Relative levels of expression were determined by normalization to *GAPDH*.  
96 Samples were assayed on Step One Plus<sup>™</sup> Real Time PCR Systems (Applied

97 Biosystems).

98 **Chromatin immunoprecipitation (ChIP) assay**

99 ChIP assay was performed as previously described (Nakamura et al. 2014). Antibodies

100 used for the immunoprecipitation are anti-mouse/human KAT13D/CLOCK antibody

101 ChIP grade (rabbit polyclonal IgG) (Abcam, Cambridge, MA), control purified rabbit

102 IgG (Invitrogen, Inc., Carlsbad, CA), control purified mouse IgG (Life Technologies

103 Cooperation, Carlsbad, CA). Equivalent masses of immunoprecipitated and input DNA

104 were analyzed by real-time PCR using primers and a TaqMan probe for the promoter

105 region of IL-23R as described below.

106 *IL-23R primers;*

107 Sense (5'-CTCAAATCCAGGCCTGTCTT-3'),

108 Antisense (5'-CGGCCCTGTAAATCCTGAAGAT-3'),

109 TaqMan probe (5'-FAM-CTCCTCTTGGCATTGT-MGB-3').

110 Data are presented as the ratio of the cycling threshold value of immunoprecipitated

111 DNA to that of input DNA.

112 **Histology and immunohistochemistry**

113 Sections from 4% paraformaldehyde, paraffin-embedded ears and back skins were  
114 stained with H&E. For immunohistochemistry, sections were deparaffinized and  
115 hydrated by washing sections in Xylene followed by a graded alcohol series. Sections  
116 were incubated in target retrieval solution (DAKO #S2367) 95°C for 30 min, and  
117 endogenous peroxidase activity was quenched by treating sections with 0.3% hydrogen  
118 peroxide methanol for 10 min at room temperature. Sections were blocked for 60 min  
119 (DS pharma #UKB40) at room temperature followed by incubation with primary Abs  
120 (goat anti-CD3ε, Santa Cruz #SC-1127, ×2000) over night at 4°C. Samples were  
121 washed and incubated for 60 min with secondary Abs (rabbit anti-goat  
122 immunoglobulins/biotinylated, DAKO #E-0466, ×500) and developed using DAKO  
123 LSAB+System-HRP (#K0679). All stained sections were counterstained with  
124 hematoxylin. The staining intensity was measured in five randomly selected fields (660  
125 × 875 μm) at a magnification of ×200. The mean intensity was calculated for each  
126 specimen.

## 127 **Statistical analysis**

128 The statistical analyses were performed using the unpaired Student's *t*-test for two



129 group-comparisons, and ANOVA for comparison of more than two groups.

130

131 **Supplementary Reference**

132 Nakamura Y, Nakano N, Ishimaru K, *et al.* (2014) Circadian regulation of allergic

133 reactions by the mast cell clock in mice. *J Allergy Clin Immunol* 133:568-575.

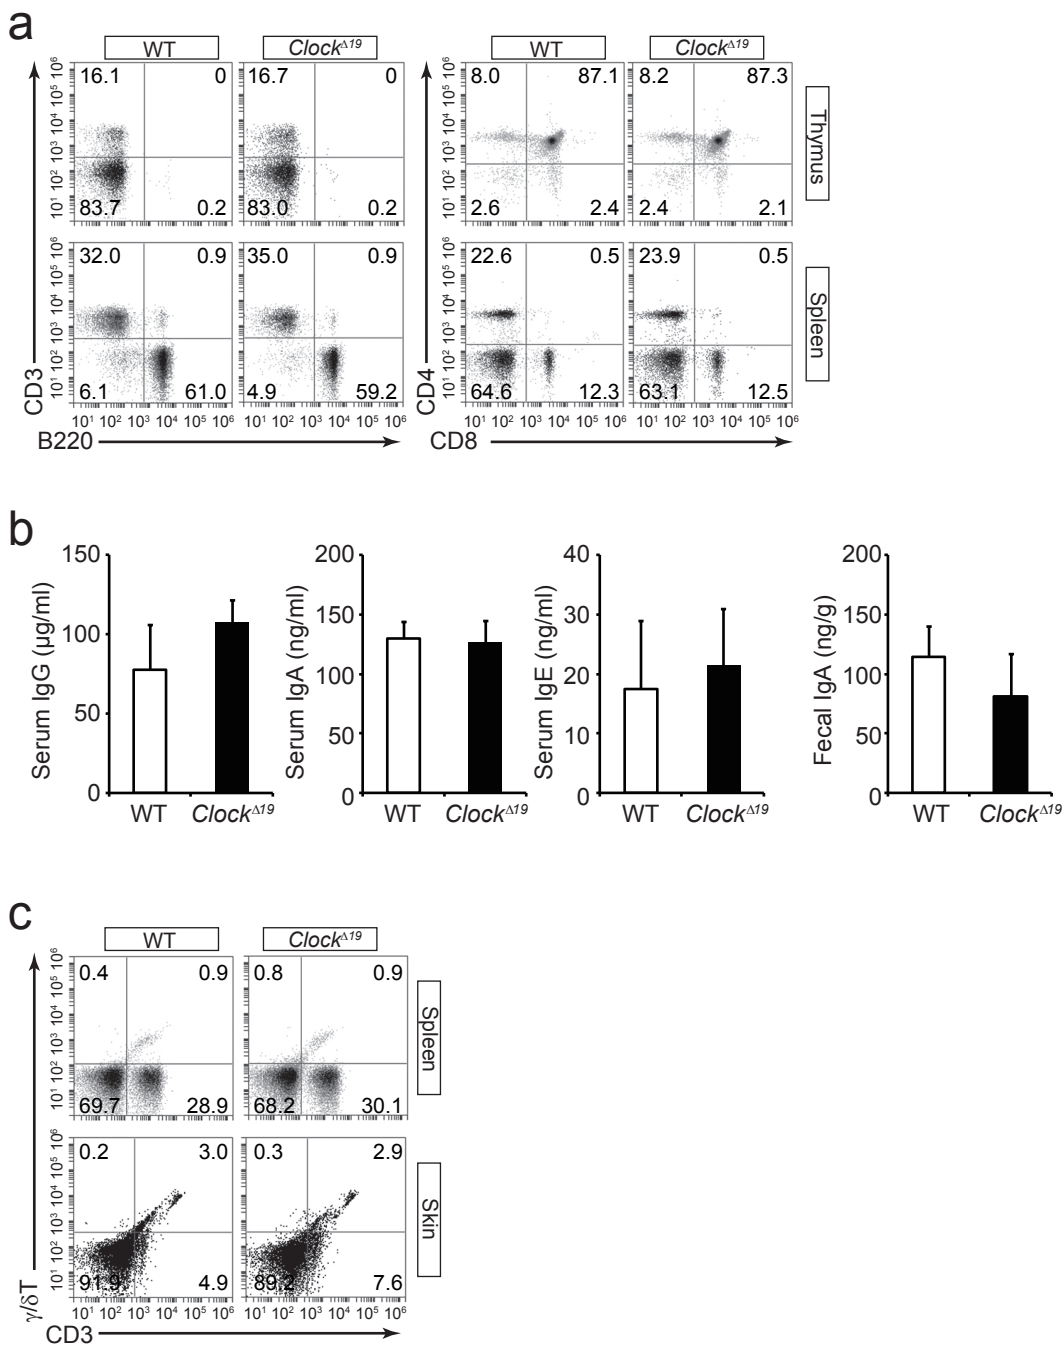

**Figure S1**

*Clock*<sup>Δ19/Δ19</sup> mice do not have obvious developmental defects in the immune system.

a. Frequency of T cells and B cells in the thymus and spleen obtained from wild-type and *Clock*<sup>Δ19/Δ19</sup> mice.

b. Serum IgG, IgA, IgE, and fecal IgA levels in wild-type and *Clock*<sup>Δ19/Δ19</sup> mice

c. Frequency of  $\gamma/\delta$  T cells in the spleen and skin in wild-type and *Clock*<sup>Δ19/Δ19</sup> mice at ZT2.

Representative data (a-c) out of 3 independent experiments are shown.

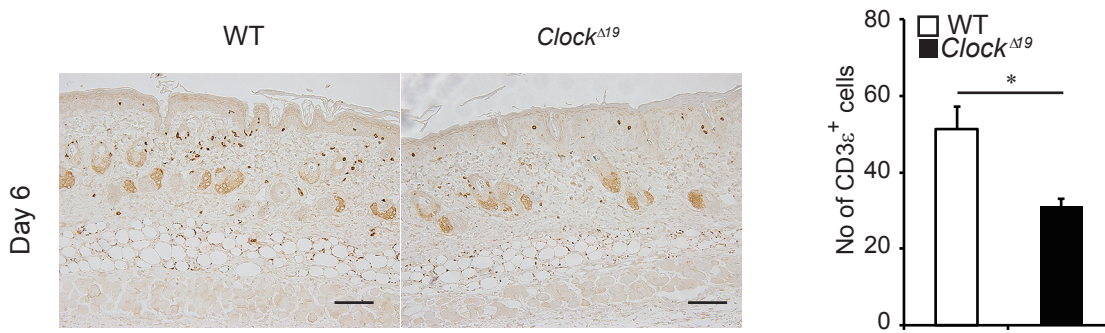

## Figure S2

The number of infiltrating CD3<sup>+</sup> T cells into the mouse skin.

The number of infiltrating CD3<sup>+</sup> T cells into the skin in IMQ-treated wild-type mice or *Clock*<sup>Δ19/Δ19</sup> mice on Day 6 (n=3 per group). Scale bar=100 μm.

The values represent the means ± SD. \*p < 0.05

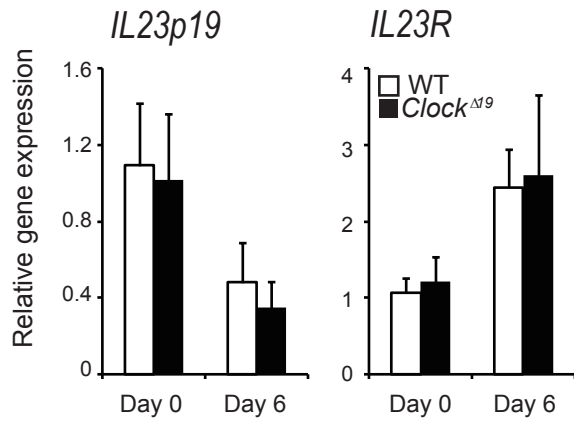

Figure S3

IL-23 and IL-23R mRNA expression in the mouse skin on Day 0 and Day 6

IL-23 or IL-23R mRNA expression in the skin of IMQ-treated wild-type mice or *Clock*<sup>Δ19/Δ19</sup> mice at ZT2 on Day 0 and Day 6 (n=3-5 per group).

The values represent the means ± SD.

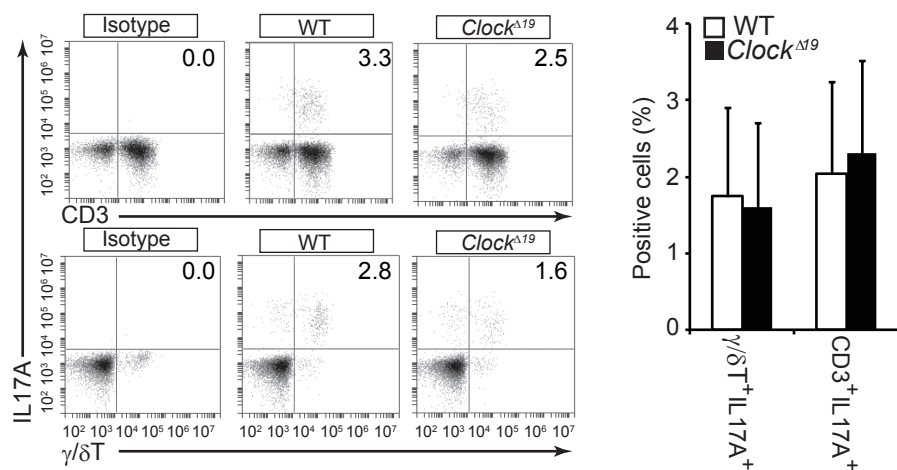

Figure S4

Frequency of IL-17<sup>+</sup> T cells in the cervical lymph nodes of IMQ-treated mice

Frequency of IL-17<sup>+</sup> T cells ( $\gamma/\delta^+ IL-17^+$  cells,  $CD3^+ IL-17^+$  cells) in the cervical lymph nodes evaluated by FACS analysis in IMQ-treated wild-type or  $Clock^{\Delta 19/\Delta 19}$  mice on day 6 (n=3-5 per group). The values represent the means  $\pm$  SD.

cattacgactggaagcaagcaatcaaacagacacagtgctggagcagtagttgagagctccattgagtcataaagtggaggcagggga  
 catcaagattgttctgttctgtgtctagcttttgaacccttaagctcacccttagtggcacacctccctcaggaca**cacctt**taacccttc  
 caagacagtccaccaactagaagccaagcatc**caagtt**catgagtc**caagggg**cattctcattcaatccac**caatg**aactgtttagt  
 cagggattctattcctgcacaaacattatgccaagaag**caagtt**ggggaggaaagggttattccatacttctgttcattccaaggggag  
 tcaggactggaactcaagcaggtcaggaagcaggagctgatgcagaggccatggaggatgttactactggcttgctccctggctg  
 ct**cagctt**gcagaatccagactaccagcccagggatggcaccaccacaatgggcctccctgcttgatcactagttaagaaaatgcctt  
 acagctg**tat**ctcatggaggcatttct**cagctg**aagttccttctgtggttaactcctctgtgcaagctgacacacaaaaccagccagt  
 acaggaaccacaaggaacgtgaagggatgaacatgaagcagtcactctgccacttacaggaagctgcaaagctggctccctgc  
 tccactttccttcc**ccaaatccaggcctgtctt**ccctgt**ctcctctggcattt**gtggca**atcttcaggatttcagggccg**taagatctgtccc  
 ctctacctttgtaagatgcccttgccctggcttaggctccttttatgtcttggctggaggtacatatatagcttccctcattctcatttctca**caa**  
**ttt**cacaagctaaaattgtgttcttctcactcaccattcgccctcaagaacgagggggaagattgacacagagaacctccactctggatg  
 gggaaacacgggtgtctgttaagcctcaacaagcttctgagtaggggtgggaaatgaggctgacaggagagagtggtgctactgcct  
 ccttagttacctcgggtaacatgacctccagagacgctggatggagtagagggttctccaatgctcctctgcactccttattctccca  
 actccagtgtagtggcaggtacaaaa**caactg**ctcatagactga**cattt**cttttaagatgtttcgtttgctaccaggtctcactatgta  
 gctctacctaggtgacttagttaaagttcattgatgtgaagagacaccatgactacgacaactcttagagagaacaacattaattagactg  
 gctta**cagttt**caatgattcagtcattatcatcatggcggaagcatggcagccttcaggcagacatggtgatggaggaactgagaggtc  
 taaatcctgatccgaaggcagctaggaagagactctgttctgctctgggtgaagcttggacaccaagagtcctaaaacc**cacctg**caca  
 gtgacacacttctccaataaggtcacacccattccaacaagaccacacctcctaataatgccacttccatgagccaag**catatt**caa  
 ccacc**acctg**gcctagagctccatagacc**caggtt**gaccttgaactcaagatctgcttacctctgtctctatgtgcaggaattaaaatgtg  
 catgaccaccattgacctgtttgacttctgcagaagactctgtttcaattaaggcaaggaaaaaaactgacaaggcagct**cactt**ca  
 gtaatctgggttttccaatagtgacatgacaactagtcatatgaaatggacacgagttccttcaagaaatgaaatgtaggtcaggg  
 ctctgtgacattt**cattt**cctcataggtaaaagcctgaag**caaatg**ctaacagt**CAGGCAGTGGGAAAGAAGACAGC**  
**ACAGCCAGGAGGGCAGCGGCTTGATTCTGAAGAGAGAAAGTAATGCAAACAATGAAAAGAG**

Sense primer →

TaqMan probe

← Antisense primer

## Figure S5

E-box-like elements in the promoter region of the mouse *IL-23R*

There are several E-box-like elements ( “CANNTG” or “CANNTT” ) present in the promoter region of the mouse *IL-23R*. CLOCK/BMAL1-mediated circadian control of a gene transcription can be driven by non-canonical E-box sequences in the promoter region of the gene. “CANNTG” or “CANNTT” indicate green.

The 1st exon sequence indicates blue.

Primers and probe sequence sites used for the CHIP assay (*IL-23R*) are also shown in red.

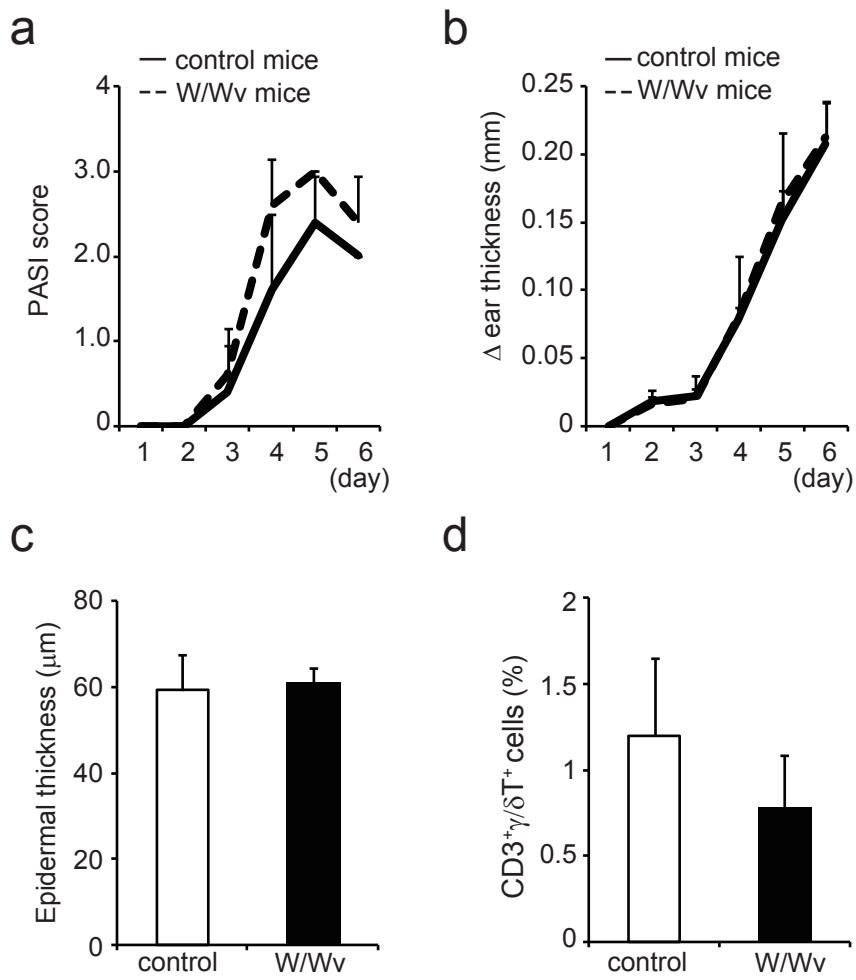

**Figure S6**

Mast cells play a marginal role in IMQ-induced dermatitis in the current experimental conditions. a-d. Mast cell-deficient W/Wv mice and their control mice were treated daily with topical IMQ for 5 days and PASI score in the dorsal skin (a), ear thickness (b), epidermal thickness (c), and frequency of CD3<sup>+</sup>γδ<sup>+</sup>T cells in the cervical lymph nodes (d) are shown (n=5 per group). The values represent the means ± SD.
